# Supplementary material for: Genetic Diversity and Differentiation at Structurally Varying MHC Haplotypes and Microsatellites in Bottlenecked Populations of Endangered Crested Ibis
Source: MDPI journal article supplement (doi:10.3390/cells8040377), 2019-04-25
Supplement: s1 [file s1]

**Table S3** Results of linkage disequilibrium (LD) test from Arlequin

| Linked Allele<br>( <i>DAB</i> – <i>UAA</i> ) | Population             |                      |           |                |           |                |           |                |           |                |           |                |           |                |           |                |
|----------------------------------------------|------------------------|----------------------|-----------|----------------|-----------|----------------|-----------|----------------|-----------|----------------|-----------|----------------|-----------|----------------|-----------|----------------|
|                                              | Wild                   |                      | YX        |                | LGT       |                | DQ        |                | BJ        |                | SD        |                | HN        |                | Overall   |                |
|                                              | <i>D'</i> <sup>a</sup> | LD test <sup>b</sup> | <i>D'</i> | LD test        |
| 01–01                                        | 1.00                   |                      | 1.00*     |                | 1.00      |                | 1.00*     |                | /         |                | /         |                | /         |                | 1.00*     |                |
| 01–02                                        | -1.00                  |                      | -1.00     |                | -1.00     |                | -1.00     |                | /         |                | /         |                | /         |                | -1.00     |                |
| 02–01                                        | 1.00*                  | $\chi^2 =$           | 1.00*     | $\chi^2 =$     | 0.93*     | $\chi^2 =$     | 0.93*     | $\chi^2 =$     | 1.00*     | $\chi^2 =$     | 1.00*     | $\chi^2 =$     | 1.00*     | $\chi^2 =$     | 0.97*     | $\chi^2 =$     |
| 02–02                                        | -1.00                  | 11.470               | -1.00     | 65.306         | -0.93     | 59.369         | -0.93     | 52.419         | -1.00     | 17.408         | -1.00     | 8.918          | -1.00     | 86.545         | -0.97     | 259.219        |
| 03–01                                        | -1.00                  | ( <i>P</i> =         | -1.00     | ( <i>P</i> =   | -1.00     | ( <i>P</i> =   | -1.00     | ( <i>P</i> =   | -0.51     | ( <i>P</i> =   | -0.75     | ( <i>P</i> =   | -0.94     | ( <i>P</i> =   | -0.80     | ( <i>P</i> =   |
| 03–02                                        | 1.00*                  | 0.009, 3 d.f.)       | 1.00*     | 0.000, 3 d.f.) | 1.00*     | 0.000, 3 d.f.) | 1.00*     | 0.000, 3 d.f.) | 0.51*     | 0.000, 2 d.f.) | 0.75*     | 0.012, 2 d.f.) | 0.94*     | 0.000, 2 d.f.) | 0.80*     | 0.000, 3 d.f.) |
| 04–01                                        | -0.20                  |                      | -0.05     |                | -0.12     |                | -0.48     |                | -0.20     |                | 0.52      |                | 0.89*     |                | 0.18      |                |
| 04–02                                        | 0.20                   |                      | 0.05      |                | 0.12      |                | 0.48*     |                | 0.20      |                | -0.52     |                | -0.89     |                | -0.18     |                |

<sup>a</sup>Standard disequilibrium value ( $D' = D / D_{\max}$ ), calculated between linked alleles based on estimated haplotypes (gametic phase known). Significant values are indicated by asterisks ( $P < 0.05$ ). There was no value when a certain *DAB* allele was absent with both *UAA* alleles, and this is indicated by a slash. <sup>b</sup>Results of LD tests performed between *DAB* and *UAA* via a likelihood ratio test (gametic phase known).
