# Supplementary material for: Genetic Diversity and Differentiation at Structurally Varying MHC Haplotypes and Microsatellites in Bottlenecked Populations of Endangered Crested Ibis
Source: MDPI journal article supplement (doi:10.3390/cells8040377), 2019-04-25
Supplement: s1 [file s1]

**Table S6** Allele frequencies (%) of microsatellite loci across seven populations of crested ibis

| Locus  | Allele | Population |      |      |       |      |       |      |
|--------|--------|------------|------|------|-------|------|-------|------|
|        |        | Wild       | YX   | LGT  | DQ    | BJ   | SD    | HN   |
| NN01   | 199    | 31.3       | 39.2 | 31.0 | 46.7  | 30.0 | 16.7  | 9.9  |
|        | 205    | 25.0       | 11.5 | 12.0 | 5.6   | 8.6  | 22.2  | 16.3 |
|        | 197    | 43.8       | 49.2 | 57.0 | 47.8  | 61.4 | 61.1  | 73.8 |
| NN03   | 297    | 81.3       | 86.2 | 87.0 | 100.0 | 55.7 | 100.0 | 97.1 |
|        | 303    | 18.8       | 13.8 | 13.0 | 0.0   | 44.3 | 0.0   | 2.9  |
| NN04   | 213    | 50.0       | 36.2 | 40.0 | 21.1  | 42.9 | 52.8  | 58.1 |
|        | 215    | 50.0       | 63.8 | 60.0 | 78.9  | 57.1 | 47.2  | 41.9 |
| NN12   | 238    | 37.5       | 43.8 | 28.0 | 23.3  | 34.3 | 25.0  | 59.3 |
|        | 240    | 31.3       | 13.8 | 36.0 | 40.0  | 22.9 | 33.3  | 25.6 |
|        | 242    | 31.3       | 42.3 | 36.0 | 36.7  | 42.9 | 41.7  | 15.1 |
| NN16   | 236    | 31.3       | 23.1 | 21.0 | 17.8  | 15.7 | 30.6  | 14.0 |
|        | 240    | 68.8       | 76.9 | 79.0 | 82.2  | 84.3 | 69.4  | 86.0 |
| NN17   | 286    | 50.0       | 35.4 | 39.0 | 24.4  | 35.7 | 11.1  | 5.8  |
|        | 290    | 50.0       | 64.6 | 61.0 | 75.6  | 64.3 | 88.9  | 94.2 |
| NN18   | 158    | 18.8       | 8.7  | 7.6  | 14.4  | 12.9 | 52.8  | 18.0 |
|        | 172    | 43.8       | 51.0 | 51.1 | 34.4  | 42.9 | 22.2  | 33.1 |
|        | 174    | 37.5       | 40.4 | 41.3 | 51.1  | 44.3 | 25.0  | 48.8 |
| NN21   | 175    | 62.5       | 50.8 | 45.0 | 43.3  | 22.9 | 41.7  | 32.6 |
|        | 185    | 37.5       | 49.2 | 55.0 | 56.7  | 77.1 | 58.3  | 67.4 |
| NN25   | 174    | 31.3       | 36.2 | 28.0 | 25.6  | 24.3 | 36.1  | 33.7 |
|        | 178    | 68.8       | 63.8 | 72.0 | 74.4  | 75.7 | 63.9  | 66.3 |
| NN26   | 159    | 93.8       | 83.8 | 86.0 | 87.8  | 64.3 | 69.4  | 83.7 |
|        | 167    | 6.3        | 16.2 | 14.0 | 12.2  | 35.7 | 30.6  | 16.3 |
| NnNF05 | 133    | 25.0       | 30.0 | 24.0 | 26.7  | 20.0 | 19.4  | 22.7 |
|        | 137    | 75.0       | 70.0 | 76.0 | 73.3  | 80.0 | 80.6  | 77.3 |
