# Supplementary material for: Genetic Diversity and Differentiation at Structurally Varying MHC Haplotypes and Microsatellites in Bottlenecked Populations of Endangered Crested Ibis
Source: MDPI journal article supplement (doi:10.3390/cells8040377), 2019-04-25
Supplement: s1 [file s1]

**Table S1** Details of the crested ibis samples analyzed in this study

| Population                   | Location                                                                        | No. of individuals | Type of samples | Sampling year | Application          |
|------------------------------|---------------------------------------------------------------------------------|--------------------|-----------------|---------------|----------------------|
| Deqing (DQ, N = 45)          | Xiazhuhu Crested Ibis Breeding Center, Deqing, China                            | 10                 | feather         | 2008          | MHC / microsatellite |
|                              |                                                                                 | 15                 | blood           | 2010          | MHC / microsatellite |
|                              |                                                                                 | 10                 | blood           | 2011          | MHC / microsatellite |
|                              |                                                                                 | 10                 | muscle          | 2012          | MHC / microsatellite |
| Sado (SQ, N = 18)            | Sado Crested Ibis Conservation Center, Niigata, Japan                           | 10                 | blood           | 2011          | MHC / microsatellite |
|                              |                                                                                 | 8                  | blood           | 2012          | MHC / microsatellite |
| Beijing (BJ, N = 35)         | Beijing Zoo, Beijing, China                                                     | 12                 | blood           | 2011          | MHC / microsatellite |
|                              |                                                                                 | 23                 | feather         | 2011          | MHC / microsatellite |
| Henan (HN, N = 86)           | Dongzhai Crested Ibis Breeding Center, Henan, China                             | 23                 | feather         | 2012          | MHC / microsatellite |
|                              |                                                                                 | 63                 | blood           | 2012          | MHC / microsatellite |
| Wild (N = 8)                 | Yangxian Crested Ibis Natural Reserve, Shangxi province, China                  | 1                  | feather         | 1990          | MHC / microsatellite |
|                              |                                                                                 | 6                  | blood           | 1993          | MHC / microsatellite |
|                              |                                                                                 | 1                  | feather         | 1993          | MHC / microsatellite |
| Yangxian (YX, N = 54/65)*    | Yangxian Crested Ibis Protection and Breeding Center, Shangxi province, China   | 5                  | muscle          | 1997          | MHC / microsatellite |
|                              |                                                                                 | 3                  | blood           | 2000          | MHC / microsatellite |
|                              |                                                                                 | 10                 | muscle          | 2000          | MHC / microsatellite |
|                              |                                                                                 | 1                  | feather         | 2000          | MHC / microsatellite |
|                              |                                                                                 | 11                 | eggshell        | 2005          | microsatellite       |
|                              |                                                                                 | 35                 | feather         | 2006          | MHC / microsatellite |
| Louguantai (LGT, N = 48/50)* | Louguantai Crested Ibis Protection and Breeding Center, Shangxi province, China | 1                  | blood           | 2006          | MHC / microsatellite |
|                              |                                                                                 | 2                  | feather         | 2006          | microsatellite       |
|                              |                                                                                 | 47                 | feather         | 2006          | MHC / microsatellite |
| Total                        |                                                                                 | 294                |                 |               | MHC                  |
|                              |                                                                                 | 307                |                 |               | microsatellite       |

\*Numbers before and after the slash represent the numbers of individuals used in MHC and microsatellite genotyping, respectively
