# Supplementary material for: Genetic Diversity and Differentiation at Structurally Varying MHC Haplotypes and Microsatellites in Bottlenecked Populations of Endangered Crested Ibis
Source: MDPI journal article supplement (doi:10.3390/cells8040377), 2019-04-25
Supplement: s1 [file s1]

**Table S2** Primers for PBR exon genotyping of *Nini*-MHC genes and amplification of full-length  $\text{II}\beta$  sequences in haplotype analysis

|                         | Locus                                    | Location | Primer name | Primer sequence (5'→3') | Size (bp) | $T_a$ (°C) |
|-------------------------|------------------------------------------|----------|-------------|-------------------------|-----------|------------|
| MHC class II genotyping | <i>DAB</i>                               | intron 1 | IIB1e2-F    | CCGGGGTGCTGAGAGCA       | 359       | 63         |
|                         |                                          |          |             | GC                      |           |            |
|                         |                                          | intron 2 | IIB1e2-R    | GAAATGTTCTGCCACGCA      |           |            |
|                         |                                          |          |             | CTCAC                   |           |            |
|                         | <i>DBBs</i><br>( <i>DBB1/DBB2/DBB3</i> ) | intron 1 | IIB2e2-F    | TGACCTTCCCGTGTCTGCA     | 319       | 57         |
|                         |                                          |          |             | CGAG                    |           |            |
|                         |                                          | intron 2 | IIB2e2-R    | GAAATGTTCTGCCACGCA      |           |            |
|                         |                                          |          |             | CTCAC                   |           |            |
|                         | <i>DAA</i>                               | intron 1 | IIA1e2-F    | GGGCGGTGGGAAGGGCA       | 325       | 64         |
|                         |                                          |          |             | CTGAC                   |           |            |
| MHC class I genotyping  |                                          | intron 2 | IIA1e2-R    | CCGTGCCGTGGCCGGGTT      |           |            |
|                         |                                          |          |             | GTTA                    |           |            |
|                         | <i>DBAs</i><br>( <i>DBA1/DBA2/DBA3</i> ) | intron 1 | IIA2e2-F    | CCTGGAGGGCGATGAGA       | 353       | 60         |
|                         |                                          |          |             | A                       |           |            |
|                         |                                          | intron 2 | IIA2e2-R    | CGTGGCCGGGTTGTTAC       |           |            |
|                         |                                          |          |             |                         |           |            |
|                         | <i>UAA/UBA/UCA1/UCB1/UDA</i>             | intron 1 | Ie2-CF      | TGCCCCCACCTCTGACC       | 313       | 61         |
|                         |                                          |          |             | GCCCCACTCACCCCTGC       |           |            |
|                         |                                          | intron 2 | Ie2-CR      | TCT                     |           |            |
|                         |                                          |          |             |                         |           |            |
| MHC class I genotyping  | <i>UBA</i>                               | intron 2 | Ie3-CF      | TGGTCGCGTTCAGGGGC       | 345       | 67         |
|                         |                                          |          |             | TCAC                    |           |            |
|                         |                                          | intron 3 | Ie3-CR      | GGCCGGCACACGCACCC       |           |            |
|                         |                                          |          |             | ACAG                    |           |            |
|                         |                                          | exon 3   | UBAe3-F     | CTACGACGGGAGGGACTT      | 141       | 61         |
|                         |                                          |          |             | CATGGCT                 |           |            |
|                         |                                          | exon 3   | UBAe3-R     | GTGCTCTGCAGGTAATGC      |           |            |
|                         |                                          |          |             | TTCCAGT                 |           |            |
|                         | <i>UCA1/UCA2</i>                         | exon 3   | UCAe3-F     | ACGCTGCAGCGCGTGTAT      | 195       | 60         |
|                         |                                          |          |             |                         |           |            |

|                                               |                        |               |         |                              |      |    |
|-----------------------------------------------|------------------------|---------------|---------|------------------------------|------|----|
| PCR of full-length $\text{II}\beta$ sequences | $\text{II}\beta$ genes | exon 3        | UCAe3-R | ATGCTTCTTCCGCTCAGCT<br>T     |      |    |
|                                               |                        | intron 1      | UCAi1-F | TGCCCCCACCTCTGACC            |      |    |
|                                               |                        | exon 2        | UCAi1-R | AGCTGGTGATGGCTCTGA<br>AAGT   | 251  | 60 |
|                                               |                        | exon 1        | 3UT-F*  | GTGCTGGGAGCCGACGTG<br>GCTC   |      |    |
|                                               |                        | 3'UTR (type1) | 3UT1-R  | GACAGTGTGTCCCCAGGG<br>CTCTGC | 1986 | 68 |
|                                               |                        | 3'UTR (type2) | 3UT2-R  | CGCGGCGGGGTGGCAGG<br>GATCTCG | 1668 | 68 |
|                                               |                        |               |         |                              |      |    |
|                                               |                        |               |         |                              |      |    |
|                                               |                        |               |         |                              |      |    |
|                                               |                        |               |         |                              |      |    |

$T_a$ , annealing temperature for each primer pair. \*a common forward primer was used to pair with two different reverse primers
