# Supplementary material for: Genetic Diversity and Differentiation at Structurally Varying MHC Haplotypes and Microsatellites in Bottlenecked Populations of Endangered Crested Ibis
Source: MDPI journal article supplement (doi:10.3390/cells8040377), 2019-04-25
Supplement: s1 [file s1]

**Table S7** Pairwise  $F_{ST}$  values between populations for MHC (below diagonal) and microsatellites (above diagonal)

| MHC     | Microsa<br>tellite | Group 1       |               |              |               | Group 2  | Group 3       |              |
|---------|--------------------|---------------|---------------|--------------|---------------|----------|---------------|--------------|
|         | Pop.               | Wild          | LGT           | DQ           | YX            | BJ       | SD            | HN           |
| Group 1 | Wild               |               | <b>-0.014</b> | <b>0.016</b> | <b>-0.009</b> | 0.049*   | 0.032*        | 0.090***     |
|         | LGT                | <b>-0.036</b> |               | <b>0.008</b> | <b>0.006</b>  | 0.036*** | 0.022**       | 0.066***     |
|         | DQ                 | <b>-0.027</b> | <b>0.000</b>  |              | <b>0.023*</b> | 0.081*** | 0.045***      | 0.096***     |
| Group 2 | YX                 | -0.016        | 0.013*        | 0.040**      |               | 0.046*** | 0.033***      | 0.073***     |
| Group 3 | BJ                 | 0.135**       | 0.164***      | 0.199***     | 0.110***      |          | 0.060***      | 0.099***     |
| Group 4 | SD                 | 0.016*        | 0.036*        | 0.079**      | 0.009         | 0.058**  |               | <b>0.017</b> |
|         | HN                 | 0.026*        | 0.046***      | 0.095***     | 0.029**       | 0.118*** | <b>-0.005</b> |              |

Statistical significance after sequential Bonferroni correction is indicated by asterisks (\* $P < 0.05$ , \*\* $P < 0.01$ , \*\*\* $P < 0.001$ ). The groupings were in accordance with AMOVA results.  $F_{ST}$  values within groups are shown in bold.
