# Supplementary material for: Genetic Diversity and Differentiation at Structurally Varying MHC Haplotypes and Microsatellites in Bottlenecked Populations of Endangered Crested Ibis
Source: MDPI journal article supplement (doi:10.3390/cells8040377), 2019-04-25
Supplement: s1 [file s1]

**Table S8** Results of the hierarchical AMOVA for the crested ibis

| Grouping tested                                   | MHC   |        |       | Microsatellite |       |       |
|---------------------------------------------------|-------|--------|-------|----------------|-------|-------|
|                                                   | % var | F      | P     | % var          | F     | P     |
| <b>Group1</b>                                     |       |        |       |                |       |       |
| <b>(Wild, YX, LGT, DQ) (BJ) (SD, HN)</b>          |       |        |       |                |       |       |
| Among groups [ $F_{CT}$ ]                         | 7.29  | 0.073  | 0.010 | 5.10           | 0.051 | 0.009 |
| Among populations within groups [ $F_{SC}$ ]      | 0.87  | 0.009  | 0.075 | 1.52           | 0.016 | 0.000 |
| Among individuals within populations [ $F_{ST}$ ] | 91.84 | 0.082  | 0.000 | 93.38          | 0.066 | 0.000 |
| <b>Group2</b>                                     |       |        |       |                |       |       |
| <b>(Wild, LGT, DQ) (YX) (BJ) (SD, HN)</b>         |       |        |       |                |       |       |
| Among groups [ $F_{CT}$ ]                         | 7.81  | 0.078  | 0.005 | 3.98           | 0.040 | 0.029 |
| Among populations within groups [ $F_{SC}$ ]      | -0.65 | -0.007 | 0.813 | 1.67           | 0.017 | 0.000 |
| Among individuals within populations [ $F_{ST}$ ] | 92.84 | 0.072  | 0.000 | 94.36          | 0.056 | 0.000 |
| <b>Group3</b>                                     |       |        |       |                |       |       |
| <b>(Wild) (YX) (LGT, DQ) (BJ) (SD, HN)</b>        |       |        |       |                |       |       |
| Among groups [ $F_{CT}$ ]                         | 7.13  | 0.071  | 0.040 | 3.78           | 0.038 | 0.105 |
| Among populations within groups [ $F_{SC}$ ]      | -0.19 | -0.002 | 0.529 | 1.77           | 0.018 | 0.000 |
| Among individuals within populations [ $F_{ST}$ ] | 93.06 | 0.069  | 0.000 | 94.45          | 0.056 | 0.000 |
| <b>Group4</b>                                     |       |        |       |                |       |       |
| <b>(Wild, YX) (LGT, DQ) (BJ) (SD, HN)</b>         |       |        |       |                |       |       |
| Among groups [ $F_{CT}$ ]                         | 7.22  | 0.072  | 0.019 | 4.25           | 0.043 | 0.010 |
| Among populations within groups [ $F_{SC}$ ]      | -0.37 | -0.004 | 0.680 | 1.40           | 0.015 | 0.001 |
| Among individuals within populations [ $F_{ST}$ ] | 92.95 | 0.071  | 0.000 | 94.35          | 0.057 | 0.000 |
| <b>Group5</b>                                     |       |        |       |                |       |       |
| <b>(Wild, YX) (LGT, DQ) (BJ, SD, HN)</b>          |       |        |       |                |       |       |
| Among groups [ $F_{CT}$ ]                         | 2.92  | 0.029  | 0.120 | 1.15           | 0.011 | 0.227 |
| Among populations within groups [ $F_{SC}$ ]      | 3.92  | 0.040  | 0.000 | 4.27           | 0.043 | 0.000 |
| Among individuals within populations [ $F_{ST}$ ] | 93.16 | 0.068  | 0.000 | 94.58          | 0.054 | 0.000 |
| <b>Group6</b>                                     |       |        |       |                |       |       |
| <b>(Wild, YX) (LGT, DQ) (BJ, HN) (SD)</b>         |       |        |       |                |       |       |
| Among groups [ $F_{CT}$ ]                         | 1.22  | 0.012  | 0.374 | 0.54           | 0.005 | 0.431 |
| Among populations within groups [ $F_{SC}$ ]      | 5.20  | 0.053  | 0.000 | 4.74           | 0.048 | 0.000 |

|                                                   |       |       |       |       |       |       |
|---------------------------------------------------|-------|-------|-------|-------|-------|-------|
| Among individuals within populations [ $F_{ST}$ ] | 93.59 | 0.064 | 0.000 | 94.73 | 0.053 | 0.000 |
| <b>Group7</b>                                     |       |       |       |       |       |       |
| <b>(Wild, YX, SD) (LGT, DQ) (BJ) (HN)</b>         |       |       |       |       |       |       |
| Among groups [ $F_{CT}$ ]                         | 6.72  | 0.067 | 0.026 | 3.74  | 0.037 | 0.048 |
| Among populations within groups [ $F_{SC}$ ]      | 0.18  | 0.002 | 0.396 | 1.83  | 0.019 | 0.000 |
| Among individuals within populations [ $F_{ST}$ ] | 93.10 | 0.069 | 0.000 | 94.43 | 0.056 | 0.000 |
| <b>Group8</b>                                     |       |       |       |       |       |       |
| <b>(Wild, YX, LGT, DQ) (BJ, SD, HN)</b>           |       |       |       |       |       |       |
| Among groups [ $F_{CT}$ ]                         | 3.94  | 0.039 | 0.083 | 2.63  | 0.026 | 0.057 |
| Among populations within groups [ $F_{SC}$ ]      | 3.72  | 0.039 | 0.000 | 3.53  | 0.036 | 0.000 |
| Among individuals within populations [ $F_{ST}$ ] | 92.34 | 0.077 | 0.000 | 93.83 | 0.062 | 0.000 |
| <b>Group9</b>                                     |       |       |       |       |       |       |
| <b>(Wild, YX, LGT, DQ) (BJ, HN) (SD)</b>          |       |       |       |       |       |       |
| Among groups [ $F_{CT}$ ]                         | 2.35  | 0.227 | 0.024 | 2.12  | 0.021 | 0.153 |
| Among populations within groups [ $F_{SC}$ ]      | 4.59  | 0.000 | 0.047 | 3.74  | 0.038 | 0.000 |
| Among individuals within populations [ $F_{ST}$ ] | 93.06 | 0.000 | 0.069 | 94.14 | 0.059 | 0.000 |
| <b>Group10</b>                                    |       |       |       |       |       |       |
| <b>(Wild, YX, BJ) (LGT, DQ) (HN, SD)</b>          |       |       |       |       |       |       |
| Among groups [ $F_{CT}$ ]                         | 2.93  | 0.029 | 0.115 | 2.85  | 0.028 | 0.057 |
| Among populations within groups [ $F_{SC}$ ]      | 3.80  | 0.039 | 0.000 | 2.83  | 0.029 | 0.000 |
| Among individuals within populations [ $F_{ST}$ ] | 93.28 | 0.067 | 0.000 | 94.32 | 0.057 | 0.000 |
| <b>Group11</b>                                    |       |       |       |       |       |       |
| <b>(Wild, YX, BJ) (LGT, DQ, SD) (HN)</b>          |       |       |       |       |       |       |
| Among groups [ $F_{CT}$ ]                         | 0.81  | 0.008 | 0.312 | 2.54  | 0.025 | 0.086 |
| Among populations within groups [ $F_{SC}$ ]      | 5.56  | 0.056 | 0.000 | 3.10  | 0.032 | 0.000 |
| Among individuals within populations [ $F_{ST}$ ] | 93.63 | 0.064 | 0.000 | 94.36 | 0.056 | 0.000 |
| <b>Group12</b>                                    |       |       |       |       |       |       |
| <b>(Wild) (YX, LGT, DQ) (BJ) (SD, HN)</b>         |       |       |       |       |       |       |
| Among groups [ $F_{CT}$ ]                         | 6.44  | 0.064 | 0.030 | 4.72  | 0.047 | 0.010 |
| Among populations within groups [ $F_{SC}$ ]      | 1.29  | 0.013 | 0.024 | 1.65  | 0.047 | 0.000 |
| Among individuals within populations [ $F_{ST}$ ] | 92.27 | 0.077 | 0.000 | 93.64 | 0.064 | 0.000 |
| <b>Group13</b>                                    |       |       |       |       |       |       |

|                                                   |       |        |       |       |       |       |
|---------------------------------------------------|-------|--------|-------|-------|-------|-------|
| <b>(Wild) (YX, LGT, DQ) (BJ, SD, HN)</b>          |       |        |       |       |       |       |
| Among groups [ $F_{CT}$ ]                         | 3.02  | 0.030  | 0.169 | 2.18  | 0.022 | 0.131 |
| Among populations within groups [ $F_{SC}$ ]      | 4.21  | 0.043  | 0.000 | 3.75  | 0.038 | 0.000 |
| Among individuals within populations [ $F_{ST}$ ] | 92.77 | 0.072  | 0.000 | 94.07 | 0.059 | 0.000 |
| <b>Group14</b>                                    |       |        |       |       |       |       |
| <b>(Wild) (YX, LGT, DQ, BJ) (SD, HN)</b>          |       |        |       |       |       |       |
| Among groups [ $F_{CT}$ ]                         | -0.25 | -0.002 | 0.456 | 3.59  | 0.036 | 0.047 |
| Among populations within groups [ $F_{SC}$ ]      | 6.39  | 0.064  | 0.000 | 2.99  | 0.031 | 0.000 |
| Among individuals within populations [ $F_{ST}$ ] | 93.86 | 0.061  | 0.000 | 93.42 | 0.066 | 0.000 |
| <b>Group15</b>                                    |       |        |       |       |       |       |
| <b>(Wild, YX, LGT, DQ, BJ) (SD, HN)</b>           |       |        |       |       |       |       |
| Among groups [ $F_{CT}$ ]                         | -0.73 | 0.007  | 0.295 | 4.09  | 0.041 | 0.046 |
| Among populations within groups [ $F_{SC}$ ]      | 5.80  | 0.058  | 0.000 | 2.84  | 0.030 | 0.000 |
| Among individuals within populations [ $F_{ST}$ ] | 93.47 | 0.065  | 0.000 | 93.07 | 0.069 | 0.000 |
| <b>Group16</b>                                    |       |        |       |       |       |       |
| <b>(Wild) (YX, LGT, DQ, SD) (BJ, HN)</b>          |       |        |       |       |       |       |
| Among groups [ $F_{CT}$ ]                         | 1.56  | 0.016  | 0.298 | 1.78  | 0.018 | 0.189 |
| Among populations within groups [ $F_{SC}$ ]      | 5.20  | 0.053  | 0.000 | 4.05  | 0.041 | 0.000 |
| Among individuals within populations [ $F_{ST}$ ] | 93.23 | 0.068  | 0.000 | 94.17 | 0.058 | 0.000 |
| <b>Group17</b>                                    |       |        |       |       |       |       |
| <b>(Wild) (YX, SD) (LGT, DQ) (BJ, HN)</b>         |       |        |       |       |       |       |
| Among groups [ $F_{CT}$ ]                         | 1.43  | 0.014  | 0.314 | 0.10  | 0.001 | 0.534 |
| Among populations within groups [ $F_{SC}$ ]      | 5.03  | 0.051  | 0.000 | 5.11  | 0.051 | 0.000 |
| Among individuals within populations [ $F_{ST}$ ] | 93.54 | 0.065  | 0.000 | 94.79 | 0.052 | 0.000 |

Different groupings were tested to identify those which explain a greater percentage of variation (% var) among groups ( $F_{CT}$ ) than within groups ( $F_{SC}$ ).  $F_{CT}$  is the correlation of random haplotypes/alleles within a group of populations relative to that of random pairs of haplotypes/alleles drawn from the whole population.  $F_{SC}$  is the correlation of the molecular diversity of random haplotypes/alleles within populations relative to that of random pairs of haplotypes/alleles drawn from the region.  $F_{ST}$  is the correlation of random haplotypes/alleles within populations relative to that of random pairs of haplotypes/alleles drawn from the populations. For MHC and microsatellite, group 2 and group 1 (highlighted) respectively show the highest  $F_{CT}$  values with the most significant  $P$  values.
