# Supplementary material for: Genetic Diversity and Differentiation at Structurally Varying MHC Haplotypes and Microsatellites in Bottlenecked Populations of Endangered Crested Ibis
Source: MDPI journal article supplement (doi:10.3390/cells8040377), 2019-04-25
Supplement: s1 [file s1]

**Table S4** Summary of the *Nini-IIβ* sequences amplified by 3UT1 and 3UT2 and long-range segments amplified by P1–P4, P6, and P7 for each haplotype

| HT    | Gene organization on each fragment |                 |                  |                 |                                  |                                   |                                   |                              | Structure                                                      |
|-------|------------------------------------|-----------------|------------------|-----------------|----------------------------------|-----------------------------------|-----------------------------------|------------------------------|----------------------------------------------------------------|
| num.  | 3UT1                               | 3UT2            | P1               | P2              | P3                               | P4                                | P6                                | P7                           |                                                                |
| HT01  |                                    |                 | <i>COL11A2</i> – | <i>DAA</i> *01– | <i>DAB</i> *01– <i>DBA1</i> *01– | <i>DBA1</i> *01– <i>DBB1</i> *01– | <i>DBB2</i> *01– <i>DBA3</i> *01– |                              | <i>COL11A2</i> – <i>DAA</i> *01– <i>DAB</i> *01–               |
|       | <i>DAB</i> *01                     | <i>DBB3</i> *01 |                  |                 |                                  |                                   |                                   |                              | <i>DBA1</i> *01– <i>DBB1</i> *01– <i>DBA2</i> *01–             |
|       |                                    |                 | <i>DAA</i> *01   | <i>DAB</i> *01  | <i>DBB1</i> *01                  | <i>DBA2</i> *01 /                 | <i>DBB3</i> *01                   | <i>DBB3</i> *01– <i>BRD2</i> | <i>DBB2</i> *01– <i>DBA3</i> *01– <i>DBB3</i> *01– <i>BRD2</i> |
|       |                                    |                 |                  |                 |                                  |                                   |                                   |                              |                                                                |
|       | <i>DBB1</i> *01                    |                 |                  |                 |                                  | <i>DBA2</i> *01– <i>DBB2</i> *01– |                                   |                              |                                                                |
|       |                                    |                 |                  |                 |                                  | <i>DBA3</i> *01                   |                                   |                              |                                                                |
|       | <i>DBB2</i> *01                    |                 |                  |                 |                                  |                                   |                                   |                              |                                                                |
| HTs02 | <i>DAB</i> *02                     | <i>DBB3</i> *01 | <i>COL11A2</i> – | <i>DAA</i> *01– | <i>DAB</i> *02– <i>DBA2</i> *01– | <i>DBA2</i> *01– <i>DBB2</i> *02– | <i>DBB2</i> *02– <i>DBA3</i> *01– |                              | <i>COL11A2</i> – <i>DAA</i> *01– <i>DAB</i> *02–               |
| /06   |                                    |                 | <i>DAA</i> *01   | <i>DAB</i> *02  | <i>DBB2</i> *02                  | <i>DBA3</i> *01                   | <i>DBB3</i> *01                   | <i>DBB3</i> *01– <i>BRD2</i> | <i>DBA2</i> *01– <i>DBB2</i> *02– <i>DBA3</i> *01–             |
|       | <i>DBB2</i> *02                    |                 |                  |                 |                                  |                                   |                                   |                              | <i>DBB3</i> *01– <i>BRD2</i>                                   |
| HTs03 | <i>DAB</i> *03                     | <i>DBB3</i> *01 | <i>COL11A2</i> – | <i>DAA</i> *01– | <i>DAB</i> *03– <i>DBA3</i> *01– |                                   | <i>DAB</i> *03– <i>DBA3</i> *01–  |                              | <i>COL11A2</i> – <i>DAA</i> *01– <i>DAB</i> *03–               |
| /07   |                                    |                 | <i>DAA</i> *01   | <i>DAB</i> *03  | <i>DBB3</i> *01                  | -                                 | <i>DBB3</i> *01                   | <i>DBB3</i> *01– <i>BRD2</i> | <i>DBA3</i> *01– <i>DBB3</i> *01– <i>BRD2</i>                  |

|       |        |          |         |   |   |   |             |                            |
|-------|--------|----------|---------|---|---|---|-------------|----------------------------|
| HTs04 |        | COL11A2– | DAA*01– |   |   |   |             | COL11A2–DAA*01–DAB*04–BRD2 |
| -     | DAB*04 |          |         | - | - | - | DAB*04–BRD2 |                            |
| /05   |        | DAA*01   | DAB*04  |   |   |   |             |                            |

- indicates no PCR product (i.e. gene deletion). Gene organizations of the entire “*COL11A2*–*BRD2*” region on seven haplotypes are shown in bold.
