# Supplementary material for: Genetic Diversity and Differentiation at Structurally Varying MHC Haplotypes and Microsatellites in Bottlenecked Populations of Endangered Crested Ibis
Source: MDPI journal article supplement (doi:10.3390/cells8040377), 2019-04-25
Supplement: s1 [file s1]

**Table S5** Recombination events between the full-length sequences of *Nini-IIβ* genes, identified using RDP.

| Recombinant Sequences | Beginning<br>breakpoint | Ending<br>breakpoint | Likely Parental Sequences |
|-----------------------|-------------------------|----------------------|---------------------------|
| <i>DBB1*01</i>        | 831 (intron 2)          | n.d.                 | <i>DBB3*01, DAB*03</i>    |
|                       | 537 (exon 2)            | n.d.                 | <i>DAB*04, unknown</i>    |
| <i>DBB2*01</i>        | 1328 (intron 3)         | n.d.                 | <i>DBB3*01, DAB*03</i>    |
| <i>DBB2*02</i>        | 831 (intron 2)          | n.d.                 | <i>DBB3*01, DAB*03</i>    |
| <i>DAB*04</i>         | 1705 (intron 3)         | n.d.                 | <i>DBB3*01, unknown</i>   |

n.d. means not determined.
